# Supplementary material
Source: PubMed Central journal article supplement (PMC7792139)
Supplement: jppt_26_1_Blackmer_S_Table_2.pdf [file jppt_26_1_Blackmer_S_Table_2.pdf]

**Table S2. Primary Diagnoses of Children with Medical Complexity**

|                                                                                   | <b>Total Number<br/>(Frequency)</b> | <b>Percent</b> |
|-----------------------------------------------------------------------------------|-------------------------------------|----------------|
| Cerebral palsy, unspecified                                                       | 18                                  | 11.46          |
| Extreme immaturity<br>(gestational age 24 completed weeks)                        | 12                                  | 7.64           |
| Chromosomal abnormality, unspecified                                              | 10                                  | 6.37           |
| Hypoxic ischemic encephalopathy, unspecified                                      | 8                                   | 5.10           |
| Autistic disorder                                                                 | 7                                   | 4.46           |
| Generalized epilepsy (not intractable and without status epilepticus)             | 7                                   | 4.46           |
| Diffuse traumatic brain injury with loss of consciousness of unspecified duration | 5                                   | 3.18           |
| Lennox-Gastaut syndrome                                                           | 5                                   | 3.18           |
| Microcephaly                                                                      | 4                                   | 2.55           |
| Disorder of the autonomic nervous system, unspecified                             | 3                                   | 1.91           |
| Ehlers-Danlos Syndrome                                                            | 3                                   | 1.91           |
| Hypoplastic Left Heart Syndrome                                                   | 3                                   | 1.91           |
| Neurofibromatosis, Type 1                                                         | 3                                   | 1.91           |
| Obstructive Hydrocephalus                                                         | 3                                   | 1.91           |
| Smith-Lemli-Opitz Syndrome                                                        | 3                                   | 1.91           |
| Trisomy 21                                                                        | 3                                   | 1.91           |
| Congenital malformation of brain, unspecified                                     | 2                                   | 1.27           |
| Congenital malformation syndromes predominantly involving limbs                   | 2                                   | 1.27           |
| Heart transplant                                                                  | 2                                   | 1.27           |
| Other reduction deformities of brain                                              | 2                                   | 1.27           |
| Primary pulmonary hypertension                                                    | 2                                   | 1.27           |
| Septo-optic dysplasia of brain                                                    | 2                                   | 1.27           |
| Type 1 diabetes mellitus without complications                                    | 2                                   | 1.27           |
| Arteriovenous malformation of cerebral vessels                                    | 1                                   | 0.64           |
| Benign intracranial hypertension                                                  | 1                                   | 0.64           |
| Benign neoplasm of heart                                                          | 1                                   | 0.64           |
| Cerebral aneurysm, nonruptured                                                    | 1                                   | 0.64           |
| Common arterial trunk                                                             | 1                                   | 0.64           |
| Congenital absence, atresia and stenosis of anus with fistula                     | 1                                   | 0.64           |
| Congenital cerebral cysts                                                         | 1                                   | 0.64           |
| Congenital laryngomalacia                                                         | 1                                   | 0.64           |
| Congenital malformation syndromes predominantly associated with short stature     | 1                                   | 0.64           |
| Congenital malformations of corpus callosum                                       | 1                                   | 0.64           |
| Congenital tracheo-esophageal fistula without atresia                             | 1                                   | 0.64           |
| Di George's Syndrome                                                              | 1                                   | 0.64           |
| Disorders of gamma aminobutyric acid metabolism                                   | 1                                   | 0.64           |
| Disorders of pyruvate metabolism and gluconeogenesis                              | 1                                   | 0.64           |
| Double inlet ventricle                                                            | 1                                   | 0.64           |
| Encephalitis and encephalomyelitis                                                | 1                                   | 0.64           |
| Encephalopathy, unspecified                                                       | 1                                   | 0.64           |

**Table S2.** Primary Diagnoses of Children with Medical Complexity (*cont.*)

|                                                         | <b>Total Number<br/>(Frequency)</b> | <b>Percent</b> |
|---------------------------------------------------------|-------------------------------------|----------------|
| Eosinophilic esophagitis                                | 1                                   | 0.64           |
| Fetal alcohol syndrome (dysmorphic)                     | 1                                   | 0.64           |
| Folate deficiency anemia, unspecified                   | 1                                   | 0.64           |
| Gaucher disease                                         | 1                                   | 0.64           |
| Hemolytic-uremic syndrome                               | 1                                   | 0.64           |
| Hereditary hemorrhagic telangiectasia                   | 1                                   | 0.64           |
| Kidney transplant status                                | 1                                   | 0.64           |
| Liver transplant status                                 | 1                                   | 0.64           |
| Malignant neoplasm of unspecified part of adrenal gland | 1                                   | 0.64           |
| Metabolic disorder, unspecified                         | 1                                   | 0.64           |
| Molybdenum deficiency                                   | 1                                   | 0.64           |
| Neonatal cerebral ischemia                              | 1                                   | 0.64           |
| Neonatal cerebral leukomalacia                          | 1                                   | 0.64           |
| Neuronal ceroid lipofuscinosis                          | 1                                   | 0.64           |
| Osteogenesis imperfecta                                 | 1                                   | 0.64           |
| Necrotizing enterocolitis                               | 1                                   | 0.64           |
| Other deletions from the autosomes                      | 1                                   | 0.64           |
| Other deletions of part of a chromosome                 | 1                                   | 0.64           |
| Other glycogen storage disease                          | 1                                   | 0.64           |
| Other specified chromosome abnormalities                | 1                                   | 0.64           |
| Other specified congenital malformations                | 1                                   | 0.64           |
| Other specified congenital malformations of eye         | 1                                   | 0.64           |
| Other specified congenital malformations of heart       | 1                                   | 0.64           |
| Other specified disorders of brain                      | 1                                   | 0.64           |
| Spastic diplegic cerebral palsy                         | 1                                   | 0.64           |
| Spina bifida, unspecified                               | 1                                   | 0.64           |
| Tetralogy of Fallot                                     | 1                                   | 0.64           |
| Trisomy and partial trisomy of autosomes, unspecified   | 1                                   | 0.64           |
| Turner's syndrome, unspecified                          | 1                                   | 0.64           |
