# Supplementary material
Source: PubMed Central journal article supplement (PMC7792139)
Supplement: jppt_26_1_Blackmer_S_Table_3.pdf [file jppt_26_1_Blackmer_S_Table_3.pdf]

**Table S3. Medical Diagnoses of Children with Medical Complexity**

|                                                                                                     | Total Number<br>(Frequency) | Percent |
|-----------------------------------------------------------------------------------------------------|-----------------------------|---------|
| Other disorders of psychological development                                                        | 87                          | 11.07   |
| Other generalized epilepsy, not intractable, w/o status epilepticus                                 | 79                          | 10.05   |
| Sleep disorder, unspecified                                                                         | 40                          | 5.09    |
| Gastro-esophageal reflux disease without esophagitis                                                | 38                          | 4.83    |
| Cerebral palsy, unspecified                                                                         | 35                          | 4.45    |
| Autistic disorder                                                                                   | 33                          | 4.20    |
| Constipation, unspecified                                                                           | 21                          | 2.67    |
| Chronic respiratory failure, unspecified with hypoxia or hypercapnia                                | 20                          | 2.54    |
| Attention-deficit hyperactivity disorder, unspecified type                                          | 19                          | 2.42    |
| Unspecified intellectual disabilities                                                               | 17                          | 2.16    |
| Spastic diplegic cerebral palsy                                                                     | 16                          | 2.04    |
| Chronic obstructive pulmonary disease, unspecified                                                  | 15                          | 1.91    |
| Cortical blindness, unspecified side of brain                                                       | 15                          | 1.91    |
| Obstructive sleep apnea                                                                             | 13                          | 1.65    |
| Chromosomal abnormality, unspecified                                                                | 12                          | 1.53    |
| Extreme immaturity (gestational age 24 completed weeks)                                             | 12                          | 1.53    |
| Primary pulmonary hypertension                                                                      | 10                          | 1.27    |
| Hypoxic ischemic encephalopathy, unspecified                                                        | 9                           | 1.15    |
| Anxiety disorder, unspecified                                                                       | 8                           | 1.02    |
| Blindness and low vision                                                                            | 8                           | 1.02    |
| Dysphagia                                                                                           | 8                           | 1.02    |
| Asthma                                                                                              | 7                           | 0.89    |
| Lennox-Gastaut syndrome                                                                             | 7                           | 0.89    |
| Obstructive hydrocephalus                                                                           | 7                           | 0.89    |
| Other disorders of lung                                                                             | 7                           | 0.89    |
| Unspecified adrenocortical insufficiency                                                            | 7                           | 0.89    |
| Unspecified mood [affective] disorder                                                               | 7                           | 0.89    |
| Chronic pain syndrome                                                                               | 6                           | 0.76    |
| Hypothyroidism, unspecified                                                                         | 6                           | 0.76    |
| Diffuse traumatic brain injury with loss of consciousness of unspecified duration                   | 5                           | 0.64    |
| Dystonia, unspecified                                                                               | 5                           | 0.64    |
| Ehlers-Danlos syndrome                                                                              | 5                           | 0.64    |
| Major depressive disorder, recurrent                                                                | 5                           | 0.64    |
| Microcephaly                                                                                        | 5                           | 0.64    |
| Other reduction deformities of brain                                                                | 5                           | 0.64    |
| Quadriplegia, unspecified                                                                           | 5                           | 0.64    |
| Unspecified behavioral/emotional disorder with onset usually occurring in childhood and adolescence | 5                           | 0.64    |
| Disorder of the autonomic nervous system, unspecified                                               | 4                           | 0.51    |
| Hypertensive heart disease                                                                          | 4                           | 0.51    |
| Other sleep related movement disorders                                                              | 4                           | 0.51    |

**Table S3. Medical Diagnoses of Children with Medical Complexity (cont.)**

|                                                                               | Total Number<br>(Frequency) | Percent |
|-------------------------------------------------------------------------------|-----------------------------|---------|
| Stereotyped movement disorders                                                | 4                           | 0.51    |
| Congenital hypotonia                                                          | 3                           | 0.38    |
| Congenital malformations of corpus callosum                                   | 3                           | 0.38    |
| Disease of digestive system, unspecified                                      | 3                           | 0.38    |
| Familial dysautonomia                                                         | 3                           | 0.38    |
| Headache                                                                      | 3                           | 0.38    |
| Heart transplant status                                                       | 3                           | 0.38    |
| Hemiplegia and hemiparesis                                                    | 3                           | 0.38    |
| Hypopituitarism                                                               | 3                           | 0.38    |
| Hypoplastic left heart syndrome                                               | 3                           | 0.38    |
| Neurofibromatosis, Type 1                                                     | 3                           | 0.38    |
| Septo-optic dysplasia of brain                                                | 3                           | 0.38    |
| Smith-Lemli-Opitz syndrome                                                    | 3                           | 0.38    |
| Tetralogy of Fallot                                                           | 3                           | 0.38    |
| Trisomy 21                                                                    | 3                           | 0.38    |
| Cerebral cysts                                                                | 2                           | 0.25    |
| Chronic kidney disease, unspecified                                           | 2                           | 0.25    |
| Congenital malformation syndromes predominantly associated with short stature | 2                           | 0.25    |
| Congenital malformation of brain, unspecified                                 | 2                           | 0.25    |
| Congenital malformation syndromes predominantly involving limbs               | 2                           | 0.25    |
| Crohn's disease, unspecified, without complications                           | 2                           | 0.25    |
| Diabetes insipidus                                                            | 2                           | 0.25    |
| Eosinophilic esophagitis                                                      | 2                           | 0.25    |
| Folate deficiency anemia, unspecified                                         | 2                           | 0.25    |
| Hemiplegia following cerebral infarction affecting left nondominant side      | 2                           | 0.25    |
| Migraine, unspecified (not intractable, without status migrainosus)           | 2                           | 0.25    |
| Other disorder of bone density and structure, unspecified site                | 2                           | 0.25    |
| Other specified disorders of brain                                            | 2                           | 0.25    |
| Post-transplant lymphoproliferative disorder (PTLD)                           | 2                           | 0.25    |
| Retinopathy of prematurity, unspecified, unspecified eye                      | 2                           | 0.25    |
| Sleep apnea, unspecified                                                      | 2                           | 0.25    |
| Type 1 diabetes mellitus without complications                                | 2                           | 0.25    |
| Unspecified juvenile rheumatoid arthritis                                     | 2                           | 0.25    |
| Unspecified urinary incontinence                                              | 2                           | 0.25    |
| Vesicoureteral-reflux, unspecified                                            | 2                           | 0.25    |
| Alpha-1-antitrypsin deficiency                                                | 1                           | 0.13    |
| Anoxic brain damage, not elsewhere classified                                 | 1                           | 0.13    |
| Arteriovenous malformation of cerebral vessels                                | 1                           | 0.13    |
| Atresia of foramina of Magendie and Luschka                                   | 1                           | 0.13    |
| Autoimmune hepatitis                                                          | 1                           | 0.13    |
| Benign intracranial hypertension                                              | 1                           | 0.13    |

**Table S3. Medical Diagnoses of Children with Medical Complexity (cont.)**

|                                                                     | Total Number<br>(Frequency) | Percent |
|---------------------------------------------------------------------|-----------------------------|---------|
| Benign neoplasm of heart                                            | 1                           | 0.13    |
| Cardiac arrhythmia, unspecified                                     | 1                           | 0.13    |
| Cerebral aneurysm, nonruptured                                      | 1                           | 0.13    |
| Choanal atresia                                                     | 1                           | 0.13    |
| Cholangitis                                                         | 1                           | 0.13    |
| Chondroectodermal dysplasia                                         | 1                           | 0.13    |
| Chronic kidney disease (CKD)                                        | 1                           | 0.13    |
| Coarctation of aorta                                                | 1                           | 0.13    |
| Common arterial trunk                                               | 1                           | 0.13    |
| Complex regional pain syndrome I, unspecified                       | 1                           | 0.13    |
| Congenital absence, atresia and stenosis of anus with fistula       | 1                           | 0.13    |
| Congenital cerebral cysts                                           | 1                           | 0.13    |
| Congenital insufficiency of aortic valve                            | 1                           | 0.13    |
| Congenital laryngomalacia                                           | 1                           | 0.13    |
| Congenital tracheo-esophageal fistula without atresia               | 1                           | 0.13    |
| Cyclical vomiting, not intractable                                  | 1                           | 0.13    |
| Di George's syndrome                                                | 1                           | 0.13    |
| Disorders of gamma aminobutyric acid metabolism                     | 1                           | 0.13    |
| Disorders of pyruvate metabolism and gluconeogenesis                | 1                           | 0.13    |
| Double inlet ventricle                                              | 1                           | 0.13    |
| Encephalitis and encephalomyelitis                                  | 1                           | 0.13    |
| Encephalopathy, unspecified                                         | 1                           | 0.13    |
| Epileptic spasms                                                    | 1                           | 0.13    |
| Fetal alcohol syndrome (dysmorphic)                                 | 1                           | 0.13    |
| Gaucher disease                                                     | 1                           | 0.13    |
| Hemolytic-uremic syndrome                                           | 1                           | 0.13    |
| Hereditary deficiency of other clotting factors                     | 1                           | 0.13    |
| Hereditary hemorrhagic telangiectasia                               | 1                           | 0.13    |
| Horner's syndrome                                                   | 1                           | 0.13    |
| Immunodeficiency, unspecified                                       | 1                           | 0.13    |
| Iron deficiency anemia, unspecified                                 | 1                           | 0.13    |
| Kidney transplant status                                            | 1                           | 0.13    |
| Liver transplant status                                             | 1                           | 0.13    |
| Macrocephaly                                                        | 1                           | 0.13    |
| Malignant neoplasm of unspecified part of unspecified adrenal gland | 1                           | 0.13    |
| Metabolic disorder, unspecified                                     | 1                           | 0.13    |
| Molybdenum deficiency                                               | 1                           | 0.13    |
| Moyamoya disease                                                    | 1                           | 0.13    |
| Myoclonus                                                           | 1                           | 0.13    |
| Neonatal cerebral ischemia                                          | 1                           | 0.13    |
| Neonatal cerebral leukomalacia                                      | 1                           | 0.13    |

**Table S3.** Medical Diagnoses of Children with Medical Complexity (*cont.*)

|                                                                | Total Number<br>(Frequency) | Percent |
|----------------------------------------------------------------|-----------------------------|---------|
| Neuronal ceroid lipofuscinosis                                 | 1                           | 0.13    |
| Nontraumatic intracerebral hemorrhage, intraventricular        | 1                           | 0.13    |
| Obesity, unspecified                                           | 1                           | 0.13    |
| Osteochondrodysplasia, unspecified                             | 1                           | 0.13    |
| Osteogenesis imperfecta                                        | 1                           | 0.13    |
| Necrotizing enterocolitis                                      | 1                           | 0.13    |
| Other disorders resulting from impaired renal tubular function | 1                           | 0.13    |
| Other deletions from the autosomes                             | 1                           | 0.13    |
| Other deletions of part of a chromosome                        | 1                           | 0.13    |
| Other glycogen storage disease                                 | 1                           | 0.13    |
| Other specified chromosome abnormalities                       | 1                           | 0.13    |
| Other specified congenital malformations                       | 1                           | 0.13    |
| Other specified congenital malformations of eye                | 1                           | 0.13    |
| Other specified congenital malformations of heart              | 1                           | 0.13    |
| Other specified disorders of carbohydrate metabolism           | 1                           | 0.13    |
| Precocious puberty                                             | 1                           | 0.13    |
| Primary adrenocortical insufficiency                           | 1                           | 0.13    |
| Primary carnitine deficiency                                   | 1                           | 0.13    |
| Primary central sleep apnea                                    | 1                           | 0.13    |
| Restless legs syndrome                                         | 1                           | 0.13    |
| Scoliosis                                                      | 1                           | 0.13    |
| Sicca syndrome [Sjogren]                                       | 1                           | 0.13    |
| Spina bifida, unspecified                                      | 1                           | 0.13    |
| Syncope and collapse                                           | 1                           | 0.13    |
| Syringomyelia and syringobulbia                                | 1                           | 0.13    |
| Thrombocytopenia, unspecified                                  | 1                           | 0.13    |
| Transient cerebral ischemic attack, unspecified                | 1                           | 0.13    |
| Trisomy and partial trisomy of autosomes, unspecified          | 1                           | 0.13    |
| Turner's syndrome, unspecified                                 | 1                           | 0.13    |
| Unspecified hydronephrosis                                     | 1                           | 0.13    |
| Unspecified nystagmus                                          | 1                           | 0.13    |
| Velo-cardio-facial syndrome                                    | 1                           | 0.13    |
| Total                                                          | 786                         | 100.00  |
