# Supplementary material
Source: PubMed Central journal article supplement (PMC7792139)
Supplement: jppt_26_1_Blackmer_S_Table_4.pdf [file jppt_26_1_Blackmer_S_Table_4.pdf]

**Table S4.** All High-Risk Medications, Including Non-Prescription Medications, Utilized by Children with Medical Complexity

|                                               | Total Number<br>(Frequency) | Percent |
|-----------------------------------------------|-----------------------------|---------|
| Levetiracetam                                 | 48                          | 9.43    |
| Melatonin                                     | 44                          | 8.64    |
| Baclofen                                      | 31                          | 6.09    |
| Clonidine                                     | 24                          | 4.72    |
| Clobazam                                      | 21                          | 4.13    |
| Cyproheptadine                                | 19                          | 3.73    |
| Diazepam                                      | 15                          | 2.95    |
| Valproic acid                                 | 14                          | 2.75    |
| Glycopyrrolate                                | 13                          | 2.55    |
| Topiramate                                    | 13                          | 2.55    |
| Clonazepam                                    | 12                          | 2.36    |
| Zonisamide                                    | 12                          | 2.36    |
| Oxcarbazepine                                 | 11                          | 2.16    |
| Gabapentin                                    | 10                          | 1.96    |
| Methylphenidate                               | 10                          | 1.96    |
| Rufinamide                                    | 10                          | 1.96    |
| Sertraline                                    | 10                          | 1.96    |
| Trazodone                                     | 10                          | 1.96    |
| Cannabidiol (CBD)                             | 10                          | 1.96    |
| Aspirin                                       | 9                           | 1.77    |
| Sildenafil                                    | 9                           | 1.77    |
| Phenobarbital                                 | 8                           | 1.57    |
| Guanfacine                                    | 6                           | 1.18    |
| Somatropin                                    | 6                           | 1.18    |
| Lacosamide                                    | 5                           | 0.98    |
| Amitriptyline                                 | 4                           | 0.79    |
| Aripiprazole                                  | 4                           | 0.79    |
| Digoxin                                       | 4                           | 0.79    |
| Lamotrigine                                   | 4                           | 0.79    |
| Risperidone                                   | 4                           | 0.79    |
| Spirolactone                                  | 4                           | 0.79    |
| Bosentan                                      | 3                           | 0.59    |
| Carbamazepine                                 | 3                           | 0.59    |
| Cannabidiol (CBD)/Tetrahydrocannabidiol (TCH) | 3                           | 0.59    |
| Glycopyrrolate                                | 3                           | 0.59    |
| Immunoglobulin                                | 3                           | 0.59    |
| Lorazepam                                     | 3                           | 0.59    |
| Scopolamine                                   | 3                           | 0.59    |
| Tacrolimus                                    | 3                           | 0.59    |
| Vigabatrin                                    | 3                           | 0.59    |

**Table S4.** All High-Risk Medications, Including Non-Prescription Medications, Utilized by Children with Medical Complexity (*cont.*)

|                               | Total Number<br>(Frequency) | Percent |
|-------------------------------|-----------------------------|---------|
| Amantadine                    | 2                           | 0.39    |
| Amlodipine                    | 2                           | 0.39    |
| Atenolol                      | 2                           | 0.39    |
| Citalopram                    | 2                           | 0.39    |
| Dextroamphetamine-amphetamine | 2                           | 0.39    |
| Enoxaparin                    | 2                           | 0.39    |
| Fenfluramine                  | 2                           | 0.39    |
| Fluoxetine                    | 2                           | 0.39    |
| Guanfacine                    | 2                           | 0.39    |
| Insulin                       | 2                           | 0.39    |
| Mirtazapine                   | 2                           | 0.39    |
| Mycophenolate                 | 2                           | 0.39    |
| Quetiapine                    | 2                           | 0.39    |
| Stiripentol                   | 2                           | 0.39    |
| Warfarin                      | 2                           | 0.39    |
| Atomoxetine                   | 1                           | 0.20    |
| Buprenorphine                 | 1                           | 0.20    |
| Bupropion                     | 1                           | 0.20    |
| Carbidopa                     | 1                           | 0.20    |
| Carbidopa-levodopa            | 1                           | 0.20    |
| Chloral hydrate               | 1                           | 0.20    |
| Chlorpromazine                | 1                           | 0.20    |
| Chlorthalidone                | 1                           | 0.20    |
| Clindamycin                   | 1                           | 0.20    |
| Clopidogrel                   | 1                           | 0.20    |
| Cosyntropin                   | 1                           | 0.20    |
| Critic aid                    | 1                           | 0.20    |
| Cyclosporine                  | 1                           | 0.20    |
| Dantrolene                    | 1                           | 0.20    |
| Desmopressin                  | 1                           | 0.20    |
| Dexamethylphenidate           | 1                           | 0.20    |
| Dextroamphetamine             | 1                           | 0.20    |
| Dronabinol                    | 1                           | 0.20    |
| Eculizumab                    | 1                           | 0.20    |
| Epi 743 (investigational)     | 1                           | 0.20    |
| Ethosuxamide                  | 1                           | 0.20    |
| Felbamate                     | 1                           | 0.20    |
| Fluoxetine                    | 1                           | 0.20    |
| Gycopyrrolate                 | 1                           | 0.20    |
| Imiglucerase                  | 1                           | 0.20    |

**Table S4.** All High-Risk Medications, Including Non-Prescription Medications, Utilized by Children with Medical Complexity (*cont.*)

|                 | Total Number<br>(Frequency) | Percent |
|-----------------|-----------------------------|---------|
| Isotretinoin    | 1                           | 0.20    |
| Lidocaine       | 1                           | 0.20    |
| Lithium         | 1                           | 0.20    |
| Lorcaserin      | 1                           | 0.20    |
| Meloxicam       | 1                           | 0.20    |
| Metformin       | 1                           | 0.20    |
| Miglustat       | 1                           | 0.20    |
| Olanzapine      | 1                           | 0.20    |
| Oxcarbazepine   | 1                           | 0.20    |
| Oxycodone       | 1                           | 0.20    |
| Palivizumab     | 1                           | 0.20    |
| Phenytoin       | 1                           | 0.20    |
| Pregabalin      | 1                           | 0.20    |
| Ramelteon       | 1                           | 0.20    |
| Risperidone     | 1                           | 0.20    |
| Selegiline      | 1                           | 0.20    |
| Sirolimus       | 1                           | 0.20    |
| Testosterone    | 1                           | 0.20    |
| Tramadol        | 1                           | 0.20    |
| Trihexyphenidyl | 1                           | 0.20    |
| Zolpidem        | 1                           | 0.20    |
| Zonegran        | 1                           | 0.20    |
| Zonisamide      | 1                           | 0.20    |
| Total           | 509                         | 100     |
