# Supplementary material
Source: PubMed Central journal article supplement (PMC7792139)
Supplement: jppt_26_1_Blackmer_S_Table_5.pdf [file jppt_26_1_Blackmer_S_Table_5.pdf]

**Table S5.** Extemporaneously Compounded Medications Utilized by Children with Medical Complexity

|                     | <b>Total Number<br/>(Frequency)</b> | <b>Percent</b> |
|---------------------|-------------------------------------|----------------|
| Lansoprazole        | 13                                  | 17.11          |
| Baclofen            | 9                                   | 11.84          |
| Zinc                | 6                                   | 7.89           |
| Zonisamide          | 5                                   | 6.58           |
| Clonazepam          | 4                                   | 5.26           |
| Omeprazole          | 4                                   | 5.26           |
| Spiroinolactone     | 4                                   | 5.26           |
| Cholesterol         | 3                                   | 3.95           |
| Clonidine           | 3                                   | 3.95           |
| Amlodipine          | 2                                   | 2.63           |
| Azathioprine        | 2                                   | 2.63           |
| Enalapril           | 2                                   | 2.63           |
| Hydrochlorothiazide | 2                                   | 2.63           |
| Sildenafil          | 2                                   | 2.63           |
| Topiramate          | 2                                   | 2.63           |
| Ursodiol            | 2                                   | 2.63           |
| Acetazolamide       | 1                                   | 1.32           |
| Amantadine          | 1                                   | 1.32           |
| Atenolol            | 1                                   | 1.32           |
| Bumetanide          | 1                                   | 1.32           |
| Chloral hydrate     | 1                                   | 1.32           |
| Chlorothiazide      | 1                                   | 1.32           |
| Clopidogrel         | 1                                   | 1.32           |
| Fenfluramine        | 1                                   | 1.32           |
| Losartan            | 1                                   | 1.32           |
| Tacrolimus          | 1                                   | 1.32           |
| Trazodone           | 1                                   | 1.32           |
| Total               | 76                                  | 100.00         |
